# Supplementary material for: Validation of a Kinect V2 based rehabilitation game
Source: PLOS journal article supplement (doi:10.1371/journal.pone.0202338), 2018-08-24
Supplement: S3 (10.1371/journal.pone.0202338.s003) [file journal.pone.0202338.s003]

*S1 Table Pseudocode for preprocessing the joint data from the Kinect and Vicon system. The data was preprocessed by R2017a MATLAB. The Kinect data were transformed, filtered and synchronized (Line 1-17). The Vicon data were synchronized and down-sampled (Line 19-33). Butter, filter, floor and downsample are MATLAB functions.*

```
1:  Begin the Kinect data pre-processing procedure
2:      Load the Kinect data to array k_x, k_y and k_z
3:      % Data transformation for Kinect joint data
4:      Tran_x  $\leftarrow$  k_z
5:      Tran_y  $\leftarrow$  k_x
6:      Tran_z  $\leftarrow$  k_y
7:      For the joint data in each dimension
8:          % Filter the data
9:          Order = 6; f_cut = 3; f_sample = 15 or 30
10:         [B,A] = butter(order,2* f_cut / f_sample);
11:         flt_data = filter(B,A,data);
12:         % Synchronization
13:         Start_point = end of the clipping motion
14:         Stop_point: timestamp of the last game event
15:         cut_data = flt_data(start:stop);
16     end For Loop
17: end procedure
18:
19: Begin the Vicon data pre-processing procedure
20:     Load the filtered Vicon data to array v_x, v_y and v_z
21:     % Vicon data has been filtered using Vicon software Nexus
22:     For the joint data in each dimension
23:         % Synchronization
24:         Start_point = end of the clipping motion
25:         Stop_point: timestamp of the last game event
26:         cut_data = data(start:stop);
27:         % Down sample
28:         Kinect_samples = number of samples of cut_data from Kinect
29:         Vicon_samples = number of samples of cut_data from Vicon
30:         DwSampleRate = floor (Vicon_samples / Kinect_samples)
31:         DwSample_data = downsample (cut_data, DwSampleRate);
32     end For Loop
33: end procedure
```
